# Supplementary material
Source: PubMed Central journal article supplement (PMC423247)
Supplement: pnas_101_23_8637__2.pdf [file pnas_101_23_8637__2.pdf]

**Table 2. Chemical shifts from partial assignment of  $^1\text{H}$  NMR spectrum of oxidized *Ht* Cyt  $c_{552}$  determined to perform the magnetic axes calculation.**

| Residue | HN    | H $\alpha$ | H $\beta$   | Others                                              |
|---------|-------|------------|-------------|-----------------------------------------------------|
| N3      |       |            |             |                                                     |
| E4      |       |            |             |                                                     |
| Q5      |       |            |             |                                                     |
| L6      | 7.74  | 3.84       | 1.56        | H $\gamma$ 0.73, Q $\delta$ 0.14                    |
| A7      | 7.39  | 3.42       | 0.87        |                                                     |
| K8      | 7.95  | 4.21       | 1.92, 1.73  | Q $\epsilon$ 3.34                                   |
| Q9      | 8.36  | 3.94       | 2.20, 2.02  | H $\gamma$ 2.48, 2.32                               |
| K10     | 7.85  | 4.20       | 1.73, 1.54  | Q $\epsilon$ 2.67                                   |
| G11     | 7.54  | 4.13, 3.91 |             |                                                     |
| C12     | 8.01  | 3.12       | 2.38, 2.55  |                                                     |
| M13     | 8.41  | 6.42       | 3.02, 2.67  | H $\gamma$ 3.73, 3.09                               |
| A14     | 7.93  | 4.53       | 1.55        |                                                     |
| C15     | 8.11  | 5.69       | 4.01        |                                                     |
| H16     | 10.55 | 8.80       | 11.38, 8.41 | H $\epsilon$ 12.26                                  |
| D17     | 10.55 | 6.00       | 3.91, 3.26  |                                                     |
| L18     | 9.24  |            | 2.26, 2.05  | H $\gamma$ 1.72, Q $\delta$ 1.41, 1.35              |
| K19     | 8.69  |            | 1.94, 1.85  | Q $\gamma$ 1.50, Q $\delta$ 1.62, Q $\epsilon$ 2.09 |
| A20     | 9.19  |            | 1.67        |                                                     |
| K21     | 8.87  | 4.56       | 2.08, 2.01  | H $\gamma$ 1.56, H $\delta$ 1.78, H $\epsilon$ 2.97 |
| K22     | 8.44  | 4.85       |             | H $\epsilon$ 3.35, others 2.55, 2.14, 1.96, 1.75    |
| V23     | 7.85  | 3.61       | 1.25        | Q $\gamma$ 0.68, -0.33                              |
| G24     | 8.45  |            |             |                                                     |
| P25     |       |            |             |                                                     |
| A26     | 9.64  | 6.02       | 1.59        |                                                     |
| Y27     | 9.64  | 4.45       | 3.08, 2.93  | Q $\delta$ 6.95, Q $\epsilon$ 6.39                  |
| A28     | 9.16  | 4.08       | 1.61        |                                                     |
| D29     | 7.14  | 4.68       | 2.93        |                                                     |
| V30     | 7.82  | 3.75       | 2.13        | Q $\gamma$ 0.74, 0.43                               |
| A31     | 8.23  | 3.74       | 1.61        |                                                     |
| K32     | 7.38  | 4.06       | 1.95        | Q $\gamma$ 1.50, Q $\delta$ 1.79, Q $\epsilon$ 3.04 |

| Residue | HN    | H $\alpha$ | H $\beta$  | Others                                                                                                               |
|---------|-------|------------|------------|----------------------------------------------------------------------------------------------------------------------|
| K33     | 7.59  |            |            | Q $\epsilon$ 3.91, others 1.33, 1.26, 1.00, 0.73, 0.53                                                               |
| Y34     | 7.24  | 4.48       | 3.27, 2.32 | Q $\delta$ 7.11, Q $\epsilon$ 6.72                                                                                   |
| A35     | 7.31  | 4.06       | 1.45       |                                                                                                                      |
| G36     | 8.69  | 3.92       |            |                                                                                                                      |
| R37     | 7.74  | 4.48       | 2.09, 1.96 | H $\gamma$ 1.73, 1.61, H $\delta$ 3.27, 2.86, H $\epsilon$ 8.15, H $\eta$ 6.47                                       |
| K38     |       |            |            |                                                                                                                      |
| D39     | 8.69  | 4.90       | 3.05, 2.60 |                                                                                                                      |
| A40     | 7.30  | 3.71       | 1.52       |                                                                                                                      |
| V41     | 8.28  | 3.12       | 1.90       | Q $\gamma$ 0.79, 0.75                                                                                                |
| D42     | 7.62  | 4.19       | 2.58       |                                                                                                                      |
| Y43     | 8.42  | 4.08       | 3.10, 3.02 | Q $\delta$ 6.60, Q $\epsilon$ 6.72                                                                                   |
| L44     | 8.53  | 3.24       | 1.57       | H $\gamma$ 1.37, Q $\delta$ 0.21, 0.12                                                                               |
| A45     | 8.58  | 3.45       | 1.21       |                                                                                                                      |
| G46     | 7.71  | 4.64, 3.20 |            |                                                                                                                      |
| K47     | 7.48  | 5.33       | 2.90, 2.01 | H $\gamma$ 1.27, H $\delta$ 2.42, 1.79, H $\epsilon$ 3.64, 3.48                                                      |
| I48     | 8.57  | 4.37       | 1.38       | H $\gamma$ 0.26, -3.20, Q $\gamma$ -0.34, Q $\delta$ -0.72                                                           |
| K49     | 7.71  | 3.81       | 2.27, 1.87 |                                                                                                                      |
| K50     | 9.53  | 5.19       | 2.78, 2.67 | H $\gamma$ 2.04, H $\delta$ 2.13, H $\epsilon$ 3.33                                                                  |
| G51     | 10.62 | 9.01, 7.07 |            |                                                                                                                      |
| G52     | 10.39 | 5.71, 4.94 |            |                                                                                                                      |
| S53     | 8.63  | 4.36       | 3.62, 3.55 |                                                                                                                      |
| G54     | 7.61  | 4.25, 3.73 |            |                                                                                                                      |
| V55     | 9.83  | 3.67       | 1.98       | Q $\gamma$ 1.04, 0.27                                                                                                |
| W56     | 9.56  | 4.22       | 3.15, 2.24 | H $\delta$ 1 6.20, H $\epsilon$ 1 10.81, H $\zeta$ 2 7.06, H $\zeta$ 3 7.17, H $\epsilon$ 3 7.56,<br>H $\eta$ 2 6.88 |
| G57     | 7.40  | 3.93, 3.72 |            |                                                                                                                      |
| S58     | 8.34  | 4.36       | 3.78, 3.67 |                                                                                                                      |
| V59     | 6.94  | 3.84       | 0.90       | Q $\gamma$ 0.44, -0.14                                                                                               |
| P60     |       |            |            |                                                                                                                      |
| M61     | 9.42  |            | 1.36       | Q $\epsilon$ -17.2, H $\gamma$ -20.2, -12.8                                                                          |
| P62     |       | 5.67       |            | 2.20, 1.80                                                                                                           |
| P63     |       | 5.83       |            | 4.21, 3.24, 2.76, 2.55                                                                                               |
| Q64     | 9.20  | 5.06       | 2.66       | H $\epsilon$ 8.81, 6.70                                                                                              |
| N65     | 8.96  | 5.00       | 2.93, 2.71 | H $\delta$ 7.65, 6.93                                                                                                |

| Residue | HN   | H $\alpha$ | H $\beta$  | Others                                                                                                            |
|---------|------|------------|------------|-------------------------------------------------------------------------------------------------------------------|
| V66     | 7.62 |            | 2.17       | Q $\gamma$ 0.55, 0.33                                                                                             |
| T67     | 9.03 | 4.46       |            | Q $\gamma$ 1.23                                                                                                   |
| D68     | 8.91 | 4.26       | 2.62       |                                                                                                                   |
| A69     | 8.33 | 3.98       | 1.31       |                                                                                                                   |
| E70     | 7.81 |            | 2.28       |                                                                                                                   |
| A71     | 8.63 | 3.33       | 1.43       |                                                                                                                   |
| K72     | 7.68 | 3.55       | 1.68, 1.27 | H $\gamma$ 1.06, H $\delta$ 1.49, H $\epsilon$ 2.78                                                               |
| Q73     | 7.75 | 3.84       |            |                                                                                                                   |
| L74     | 8.28 | 3.55       |            | H $\gamma$ 1.27, Q $\delta$ 0.15, -0.05                                                                           |
| A75     | 7.73 | 2.90       | 1.08       |                                                                                                                   |
| Q76     | 8.03 | 3.59       | 2.03, 1.86 | H $\gamma$ 2.37, 2.20                                                                                             |
| W77     | 7.71 | 4.13       | 3.06       | H $\delta$ 1 7.12, H $\epsilon$ 1 10.32, H $\zeta$ 2 7.26, H $\eta$ 2 6.64, H $\zeta$ 3 5.61, H $\epsilon$ 3 6.72 |
| I78     | 7.95 | 2.17       | 0.95       | H $\gamma$ 0.89, -0.40, Q $\gamma$ -0.40, Q $\delta$ -1.21                                                        |
| L79     | 7.28 | 3.62       |            | H $\gamma$ 1.41, Q $\delta$ 0.67, 0.56                                                                            |
| S80     | 7.46 | 4.31       | 4.01, 3.80 |                                                                                                                   |
| I81     | 7.07 | 3.67       | 1.67       | H $\gamma$ 0.84, Q $\delta$ 0.03                                                                                  |
| K82     | 7.78 | 4.23       | 1.84, 1.66 | H $\gamma$ 1.38, H $\epsilon$ 3.00                                                                                |

#### Heme assignments

|                        |       |                        |       |                        |       |
|------------------------|-------|------------------------|-------|------------------------|-------|
| 1-CH <sub>3</sub>      | 18.16 | $\beta$ - <i>meso</i>  | -0.42 | 7-H $\alpha$ 1         | 12.98 |
| 2-H $\alpha$           | 1.26  | 5-CH <sub>3</sub>      | 22.89 | 7-H $\alpha$ 2         | 2.20  |
| 2-CH <sub>3</sub>      | 0.54  | 6-H $\alpha$ 1         | 3.60  | 7-H $\beta$ 1          |       |
| $\alpha$ - <i>meso</i> | 1.54  | 6-H $\alpha$ 2         |       | 7-H $\beta$ 2          | -1.13 |
| 3-CH <sub>3</sub>      | 22.29 | 6-H $\beta$ 1          |       | 8-CH <sub>3</sub>      | 24.28 |
| 4-H $\alpha$           | 0.25  | 6-H $\beta$ 2          |       | $\delta$ - <i>meso</i> | -1.17 |
| 4-CH <sub>3</sub>      | 1.20  | $\gamma$ - <i>meso</i> | 9.07  |                        |       |

The sample was in 120 mM sodium acetate-*d*<sub>3</sub> buffer (pH 5.0), 5-fold excess of ferricyanide, at 300 K. Resultant pseudocontact shifts used in the calculation are reported in Table 4.
